# Supplementary material for: Single and combinatorial chromatin coupling events underlies the function of transcript factor krüppel-like factor 11 in the regulation of gene networks
Source: PubMed Central journal article supplement (PMC4049485; doi:10.1186/1471-2199-15-10), 2014-05-25
Supplement: 1471-2199-15-10-S1.pdf [file 1471-2199-15-10-S1.pdf]

**EV WT A347S  $\Delta$ 486 EAPP**

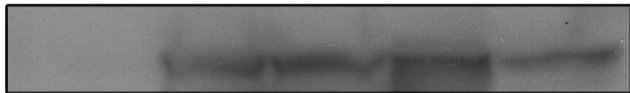

**HIS-Tag**

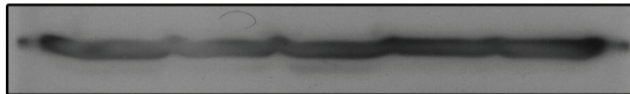

**$\alpha$ -Tubulin**
