# Supplementary material for: Single and combinatorial chromatin coupling events underlies the function of transcript factor krüppel-like factor 11 in the regulation of gene networks
Source: PubMed Central journal article supplement (PMC4049485; doi:10.1186/1471-2199-15-10), 2014-05-25

### KLF11

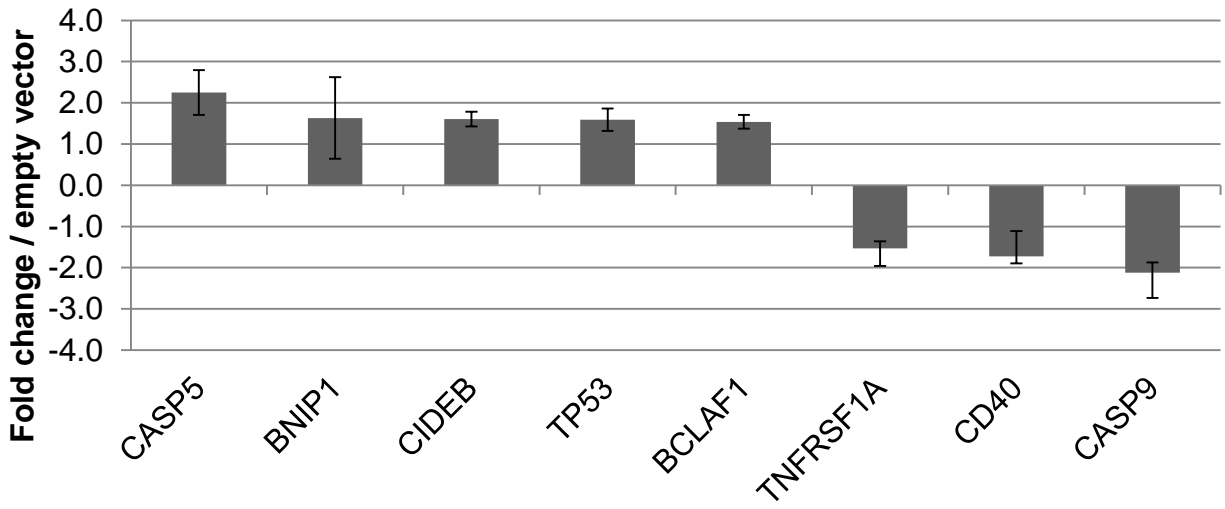

### A347S

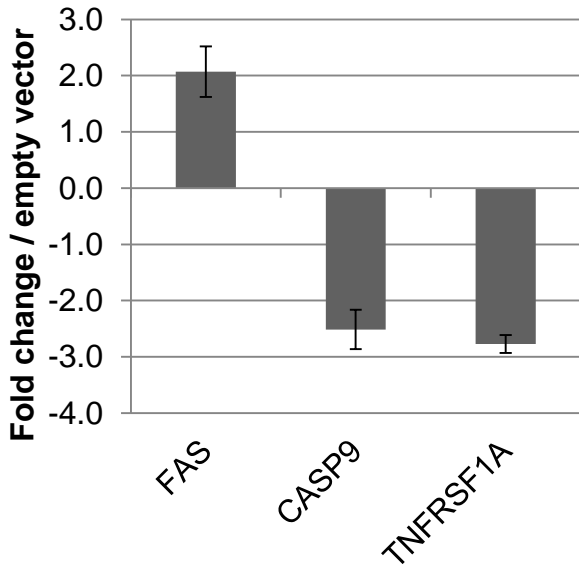

### $\Delta$ 486

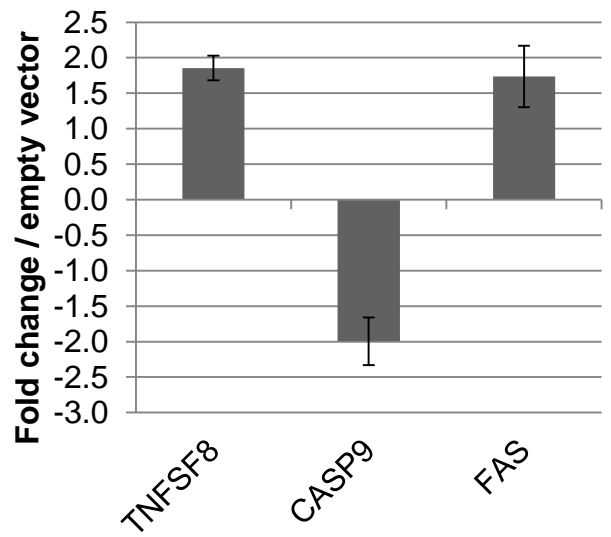

### EAPP

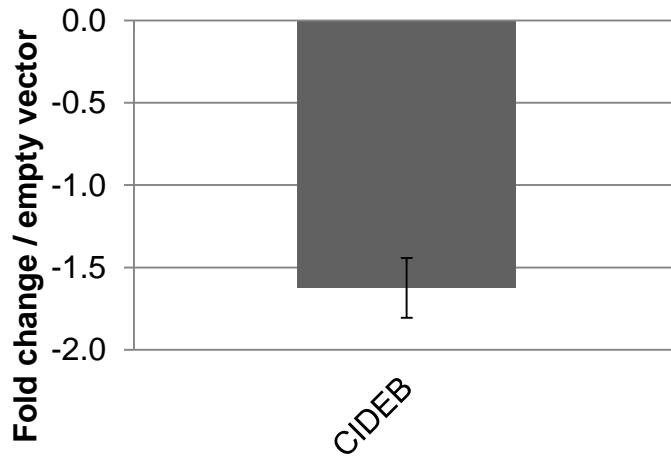

Supplement: 1471-2199-15-10-S7.pdf [file 1471-2199-15-10-S7.pdf]
